# Supplementary material for: Comprehensive cell type decomposition of circulating cell-free DNA with CelFiE
Source: PubMed Central journal article supplement (PMC8113516; doi:10.1038/s41467-021-22901-x), 2021-05-11
Supplement: 41467_2021_22901_MOESM3_ESM.pdf [file 41467_2021_22901_MOESM3_ESM.pdf]

### **Description of Additional Supplementary Files**

File Name: Supplementary Data 1

Description: ENCODE and BLUEPRINT WGBS accession codes and links.
